# Supplementary material
Source: PubMed Central journal article supplement (PMC3911518)
Supplement: MCB.00825-13_zmb999100278so1.pdf [file MCB.00825-13_zmb999100278so1.pdf]

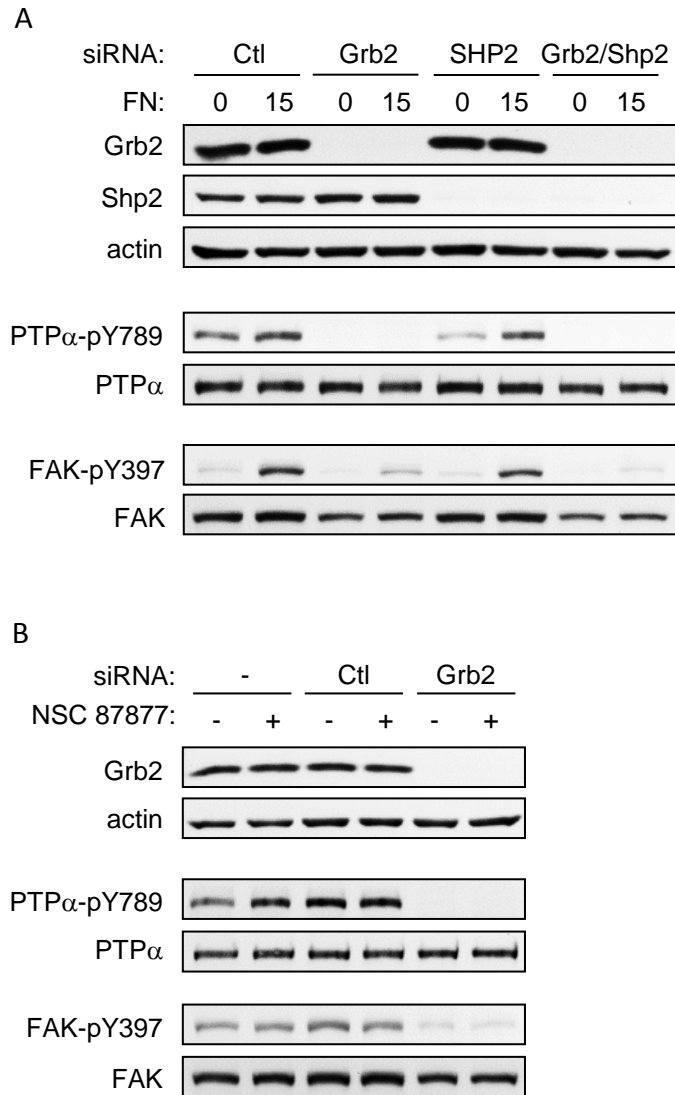

**Supplementary Figure 1. Shp2 silencing or inhibition does not rescue the effects of Grb2 depletion.** (A) MEFs treated with control (Ctl), Grb2 and/or Shp2 siRNA were kept in suspension (0) for 1 hour and replated on FN-coated coverslips/dishes for 15 min (15). Lysates were probed for Grb2, Shp2, actin, PTP $\alpha$ -pY789, PTP $\alpha$ , FAK-pY397 and FAK. (B) MEFs untreated or treated with control (Ctl) or Grb2 siRNA were kept in suspension (0) for 1 hour with or without 100 mM NSC 87877 (Shp2 inhibitor) and replated on FN-coated dishes for 15 min. Lysates were probed for Grb2, actin, PTP $\alpha$ -pY789, PTP $\alpha$ , FAK-pY397, and FAK.
